# Supplementary material for: Exploring room-temperature anti-ferromagnetism in a newly predicted 2D MBene M4B6 (M: Cr, Mn, Fe) monolayer using first-principles calculations
Source: Royal Society of Chemistry journal article supplement (doi:10.1039/d5cp00416k), 2025-01-01
Supplement: d5cp00416k1.pdf [file d5cp00416k1.pdf]

## Supporting Information (SI)

### Exploring room-temperature anti-ferromagnetism in newly predicted 2D MBene $M_4B_6$ (M: Cr, Mn, Fe) monolayer using first-principles calculations

Abdullah,<sup>1</sup> Altaf Ur Rahman,<sup>2,3,\*</sup> Milton Andre Tumelero,<sup>2</sup> Liao Jujian,<sup>1</sup>  
Sergio Garcia Magalhaes,<sup>2,†</sup> Mohammed A. Amin,<sup>4</sup> and Guang-hua Guo<sup>1,‡</sup>

<sup>1</sup>*School of Physics and Electronics, Central South University, Changsha, Hunan 410083, China*

<sup>2</sup>*Institute of Physics, UFRGS, 91509-900 Porto Alegre, Rio Grande do Sul, Brazil*

<sup>3</sup>*Department of Physics, Riphah International University, Lahore, Punjab 54000, Pakistan.*

<sup>4</sup>*Department of Chemistry, College of Science,  
Taif University, P.O. Box 11099, Taif, 21944, Saudi Arabia*

**email addresses:** \* altaf.urrahman@riphah.edu.pk,

† sergio.magalhaes@ufrgs.br,

‡ guogh@mail.csu.edu.cn

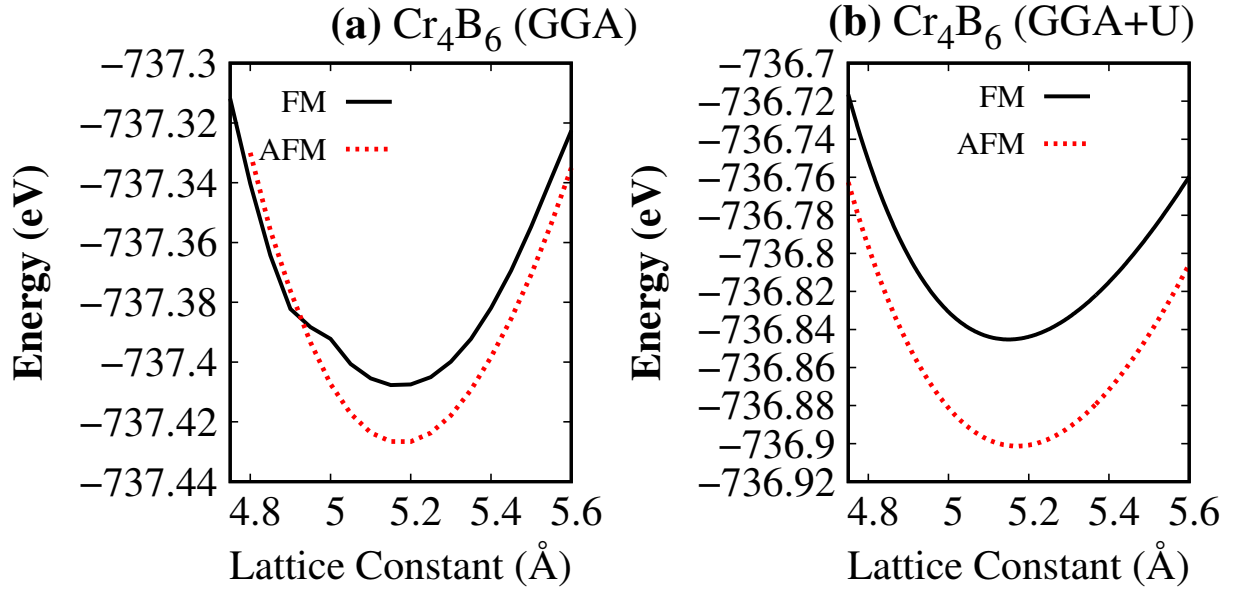

**Figure SI 1:** Total energy vs. lattice constant for both the FM and AFM states under each method (a) GGA and (b) GGA+U for a  $\text{Cr}_4\text{B}_6$  monolayer. The solid black line represent the FM state, while the red-dashed line indicate the AFM state.

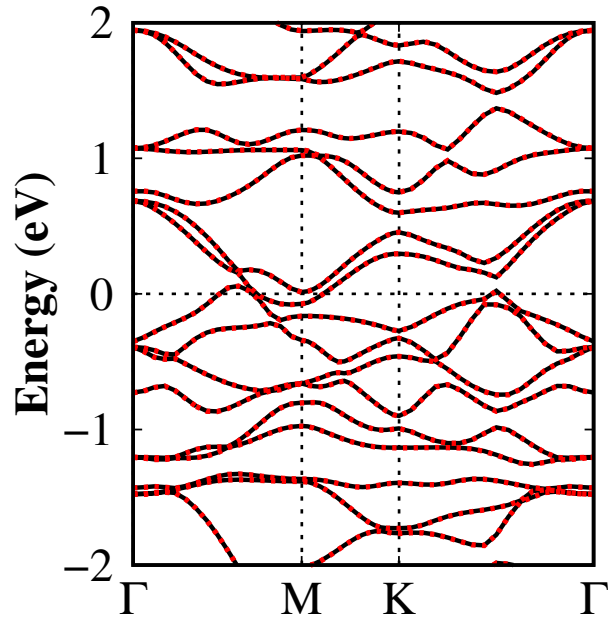

**Figure SI 2:** GGA+U calculated electronic band structure of  $\text{Cr}_4\text{B}_6$  monolayer at equilibrium lattice constant in most stable AFM state. The solid black and red-dashed lines indicate the spin-up and spin-down channels, respectively. The horizontal dashed line at zero represents the Fermi-energy level.

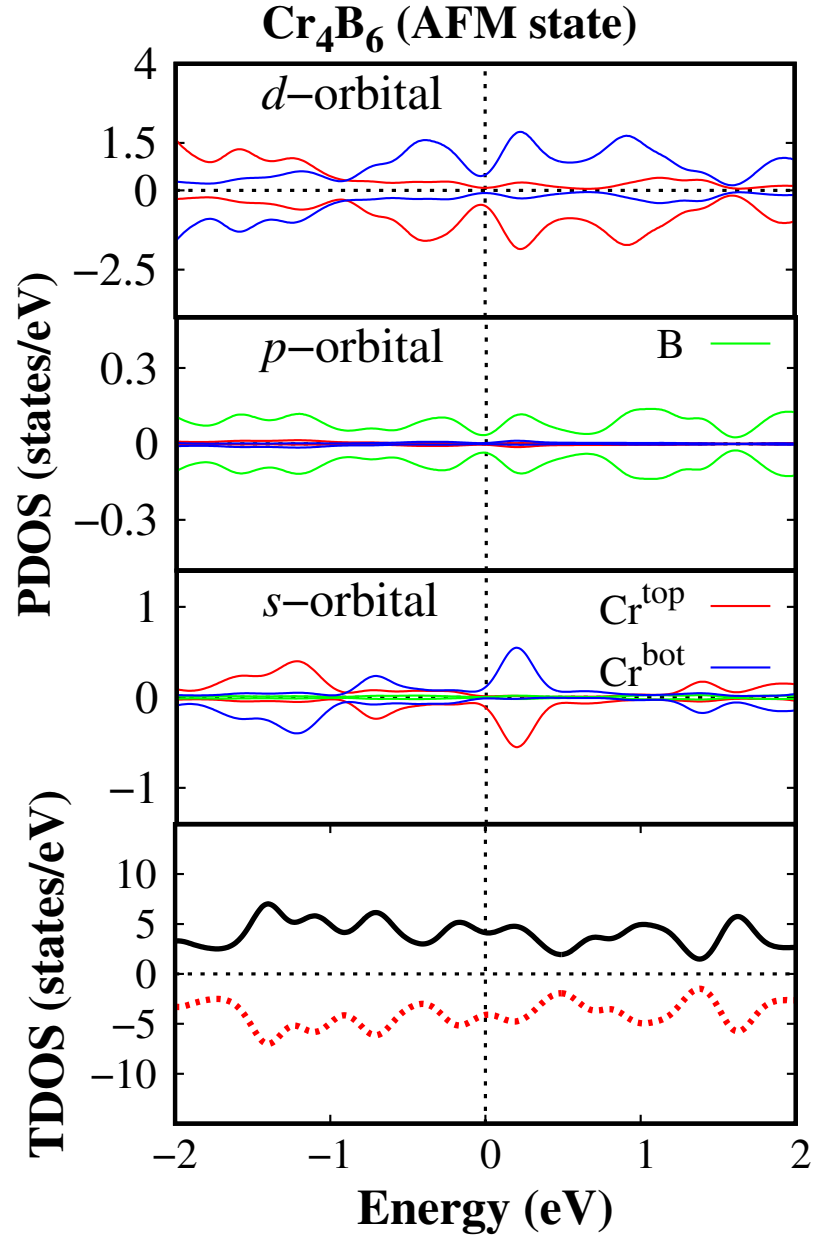

**Figure SI 3:** GGA+U calculated spin-polarized TDOS and PDOS for Cr<sub>4</sub>B<sub>6</sub> monolayer at equilibrium lattice constant in most stable AFM state. The solid black and red-dashed lines indicate the spin-up and spin-down channels, respectively. The horizontal dashed line at zero represents the Fermi-energy level.
